# Supplementary material for: A portable smartphone-based detection of glyphosate based on inhibiting peroxidase-like activity of heptanoic acid/Prussian blue decorated Fe3O4 nanoparticles
Source: Royal Society of Chemistry journal article supplement (doi:10.1039/d2ra03382h), 2022-01-01
Supplement: d2ra03382h1.pdf [file d2ra03382h1.pdf]

## Supplemental files

### **A portable smartphone-based detection of glyphosate based on inhibiting peroxidase-like activity of heptanoic acid and Prussian blue decorated Fe<sub>3</sub>O<sub>4</sub> nanoparticles**

Dan Chen <sup>a,b</sup>, Chunqiong Wang <sup>b</sup>, Dezhi Yang <sup>c</sup>, Qiulan Li <sup>c</sup>, Huimin Deng <sup>d</sup>, Li Chen <sup>e</sup>, Gaokun Zhao <sup>f</sup>, Junli Shi <sup>f</sup>, Yan Zhang <sup>b</sup>, Ke Zhang <sup>b,\*</sup>, Yaling Yang <sup>c,\*</sup>

<sup>a</sup> Peking University, School of Materials Science and Engineering, Beijing 100871, China.

<sup>b</sup> Yunnan Institute of Tobacco Quality Inspection & Supervision, Kunming 650500, China.

<sup>c</sup> Faculty of Life Science and Technology, Kunming University of Science and Technology, Kunming 650500, China.

<sup>d</sup> China National Tobacco Quality Supervision & Test Center, Zhengzhou 450001, China.

<sup>e</sup> Zhengzhou Tobacco Research Institute of CNTC, Zhengzhou, China.

<sup>f</sup> Yunnan Academy of Tobacco Agricultural Sciences, Kunming 650021, China

\*Corresponding authors.

E-mail address: swukirk@126.com (K. Zhang); yangyl2016@qq.com (Y. Yang).

**Tables:****Table S1** The precipitation efficiencies of glyphosate by co-precipitation method.

| Samples   | Spiked glyphosate<br>( $\mu\text{g mL}^{-1}$ ) | Precipitation<br>efficiencies (%) | RSD (%) |
|-----------|------------------------------------------------|-----------------------------------|---------|
| Tobacco 1 | 12.5                                           | 3.24                              | 3.33    |
|           | 50                                             | 3.11                              | 2.14    |
| Tobacco 2 | 12.5                                           | 2.47                              | 4.12    |
|           | 50                                             | 2.91                              | 3.42    |
| Water 1   | 12.5                                           | 1.87                              | 4.38    |
|           | 50                                             | 2.44                              | 2.67    |
| Water 2   | 12.5                                           | 2.64                              | 2.87    |
|           | 50                                             | 2.75                              | 4.09    |

**Table S2** Determination of glyphosate in spiked tobacco samples (n=6).

| Tobacco<br>samples | Spiked<br>( $\mu\text{g mL}^{-1}$ ) | Smartphone color sensing platform     |                 |         | GC-MS                                 |                 |            |
|--------------------|-------------------------------------|---------------------------------------|-----------------|---------|---------------------------------------|-----------------|------------|
|                    |                                     | Detected<br>( $\mu\text{g mL}^{-1}$ ) | Recovery<br>(%) | RSD (%) | Detected<br>( $\mu\text{g mL}^{-1}$ ) | Recovery<br>(%) | RSD<br>(%) |
| 1                  | 0                                   | 0                                     | -               | -       | 0                                     | -               | -          |
|                    | 12.5                                | 11.18                                 | 89.44           | 3.53    | 11.65                                 | 93.2            | 3.23       |
|                    | 50                                  | 48.55                                 | 97.1            | 4.67    | 48.54                                 | 97.08           | 4.32       |
| 2                  | 0                                   | 0                                     | -               | -       | 0                                     | -               | -          |
|                    | 12.5                                | 11.57                                 | 92.56           | 1.89    | 11.64                                 | 93.12           | 2.65       |
|                    | 50                                  | 48.34                                 | 96.68           | 4.34    | 47.87                                 | 95.74           | 5.21       |
| 3                  | 0                                   | 0                                     | -               | -       | 0                                     | -               | -          |
|                    | 12.5                                | 11.83                                 | 94.64           | 5.38    | 11.03                                 | 88.24           | 3.59       |
|                    | 50                                  | 46.56                                 | 93.12           | 3.53    | 48.32                                 | 96.64           | 4.07       |

Figures:

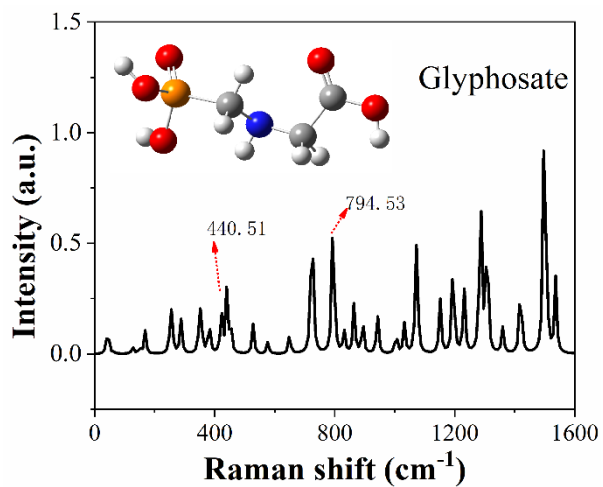

Fig. S1 The standard Raman spectra of glyphosate.

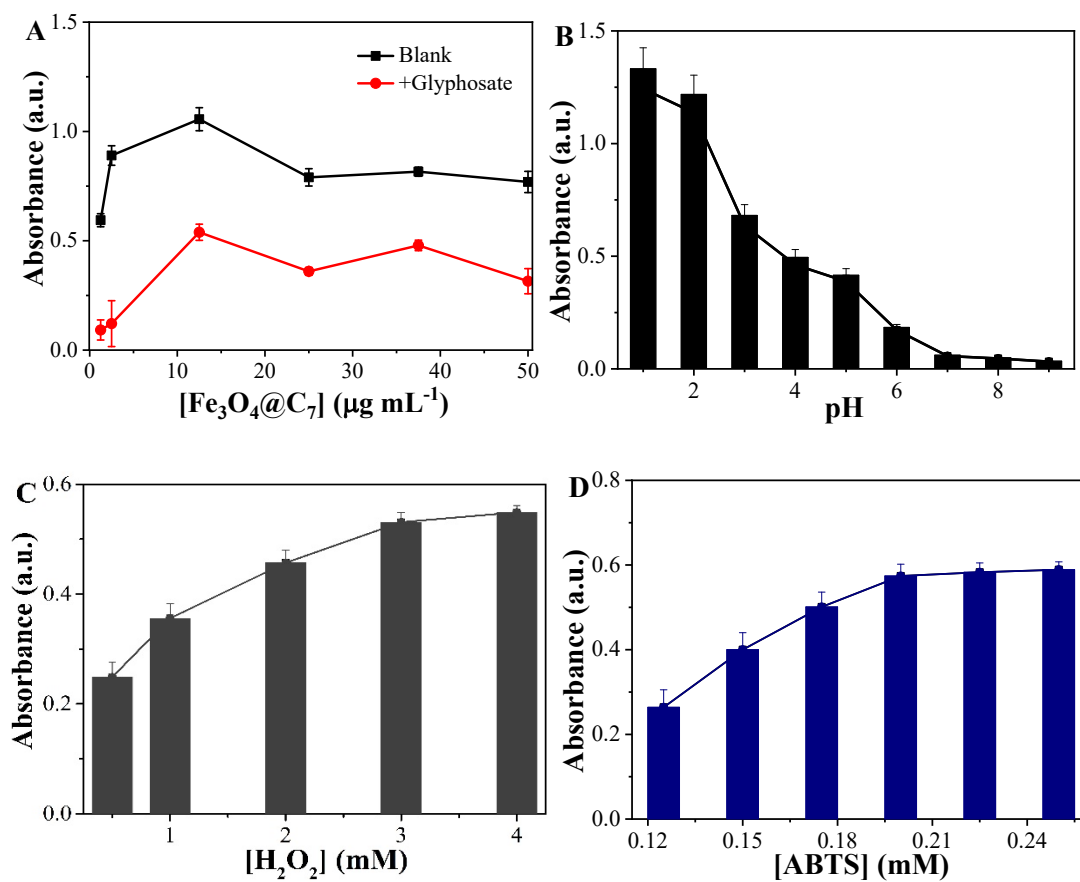

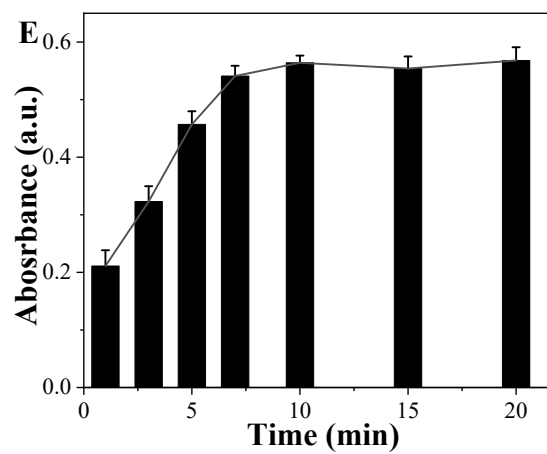

**Fig. S2** Effect of the concentrations of  $\text{Fe}_3\text{O}_4@\text{C}_7$  (A), pH (B) and substrate concentrations of  $\text{H}_2\text{O}_2$  (C) and ABTS (D).
